# Supplementary material for: Smoking induces WEE1 expression to promote docetaxel resistance in esophageal adenocarcinoma
Source: PubMed Central journal article supplement — Mol Ther Oncolytics. 2023 Aug 28;30:286–300. doi: 10.1016/j.omto.2023.08.012 (PMC10507159; doi:10.1016/j.omto.2023.08.012), 2023-08-28
Supplement: mmc1.pdf [file mmc1.pdf]

OMTO, Volume 30

## **Supplemental information**

### **Smoking induces WEE1 expression to promote docetaxel resistance in esophageal adenocarcinoma**

**Md Obaidul Islam, Krishnapriya Thangaretnam, Heng Lu, Dunfa Peng, Mohammed Soutto, Wael El-Rifai, Silvia Giordano, Yuguang Ban, Xi Chen, Daniel Bilbao, Alejandro V. Villarino, Stephan Schürer, Peter J. Hosein, and Zheng Chen**

**Table S1. Primers used for qRT-PCR**

| Primers                 | sequence                |
|-------------------------|-------------------------|
| WEE1-forward            | AGGGAATTTGATGTGCGACAG   |
| WEE1-reverse            | CTTCAAGCTCATAATCACTGGCT |
| Universal miRNA forward | GCGAGCACAGAATTAATACGAC  |
| miR-191                 | CAACGGAATCCCAAAAGCAGCTG |
| miR-129-3p              | AAGCCCTTACCCCAAAAAGTAT  |
| miR-195-5p              | TAGCAGCACAGAAATATTGGC   |

**Table S2. Predicted miRNAs that can target WEE1**

| miRNA           | miRNA           | miRNA           |
|-----------------|-----------------|-----------------|
| hsa-miR-195-5p  | hsa-miR-216a-3p | hsa-miR-381-3p  |
| hsa-miR-106a-5p | hsa-miR-23a-3p  | hsa-miR-424-5p  |
| hsa-miR-106b-5p | hsa-miR-23b-3p  | hsa-miR-497-5p  |
| hsa-miR-128-3p  | hsa-miR-27a-3p  | hsa-miR-503-5p  |
| hsa-miR-15a-5p  | hsa-miR-27b-3p  | hsa-miR-519d-3p |
| hsa-miR-15b-5p  | hsa-miR-300     | hsa-miR-520a-3p |
| hsa-miR-16-5p   | hsa-miR-302a-3p | hsa-miR-520c-3p |
| hsa-miR-17-5p   | hsa-miR-302b-3p | hsa-miR-520d-3p |
| hsa-miR-19b-3p  | hsa-miR-302d-3p | hsa-miR-526b-3p |
| hsa-miR-20a-5p  | hsa-miR-302e    | hsa-miR-6838-5p |
| hsa-miR-20b-5p  | hsa-miR-373-3p  | hsa-miR-93-5p   |

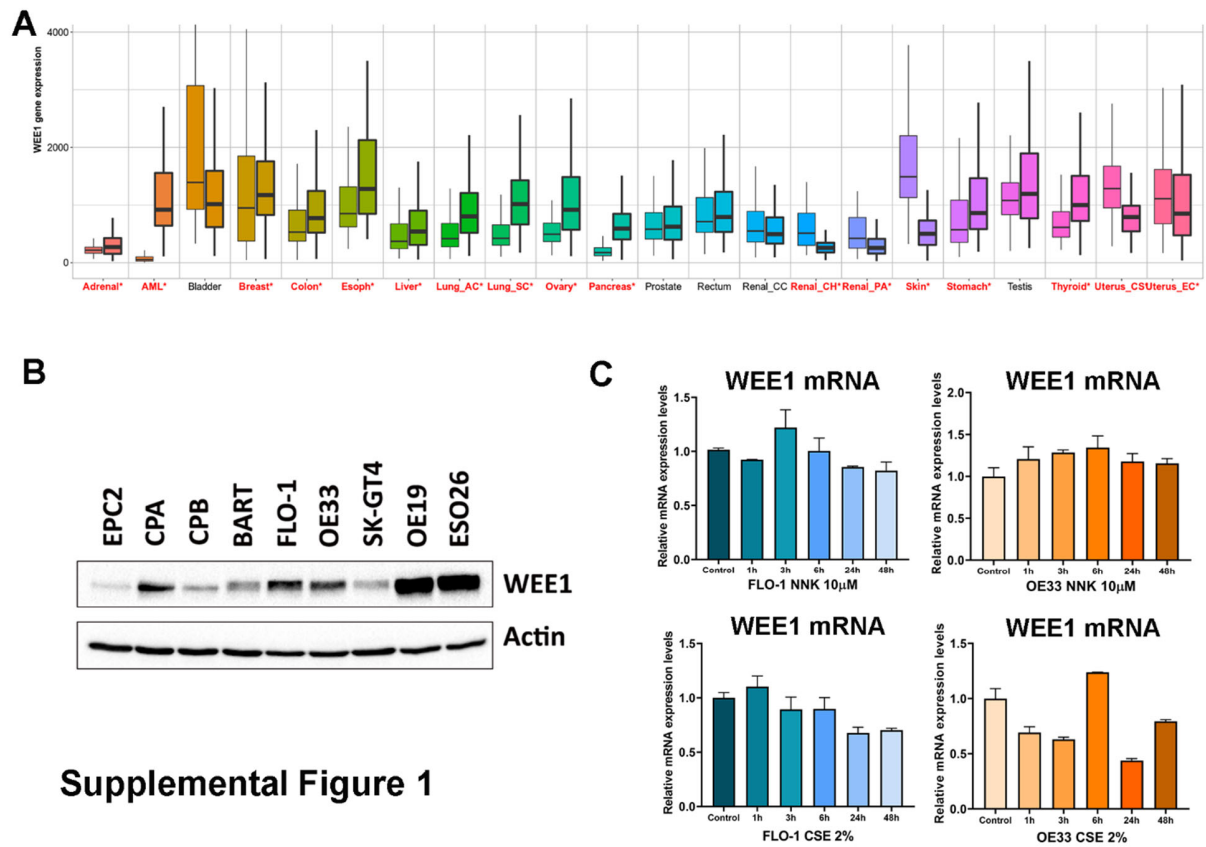

**Supplemental Figure 1**

**Figure S1.** A. WEE1 mRNA expression in 22 human cancers. Red color\* indicates significant differences in WEE1 expression. B. WEE1 baseline expression in esophageal cells. C. WEE1 mRNA expression levels after NNK and CSE treatment in FLO-1 and OE33 cells.

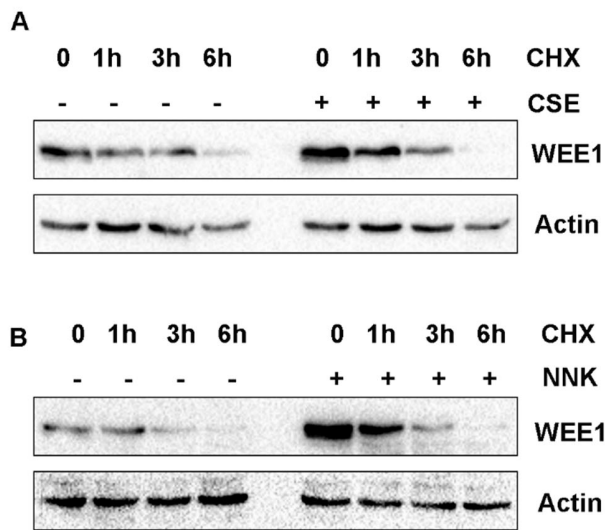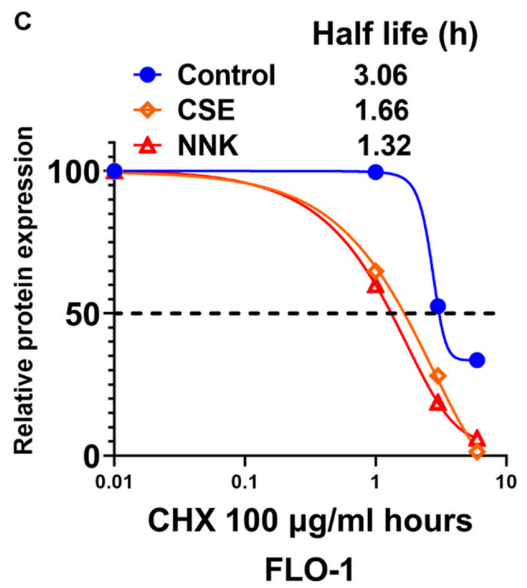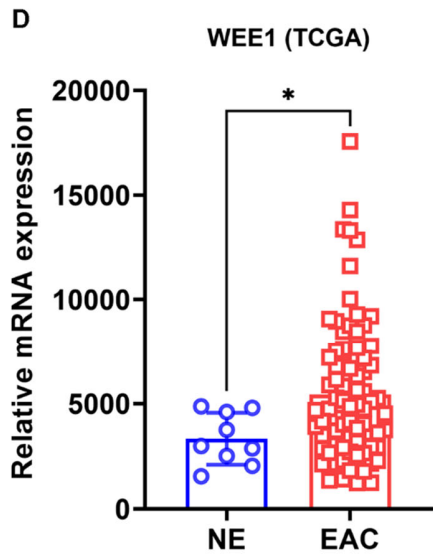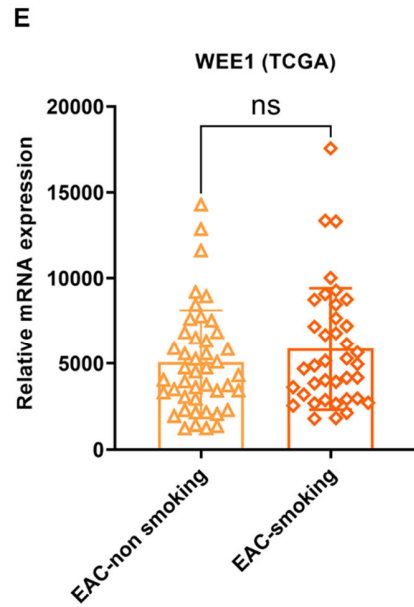

Supplemental Figure 2

**Figure S2.** A&B. Western blot analysis of WEE1 and  $\beta$ -actin expression in FLO-1 control and smoking-treated cells treated with Cycloheximide (CHX 100  $\mu$ g/ml) for 0, 1, 3, and 6 hours. C. Quantification of protein half-life from A&B. D. WEE1 relative mRNA expression in TCGA normal esophagus (NE), and esophageal adenocarcinoma (EAC) samples. E. WEE1 relative mRNA expression in TCGA EAC smoking and non-smoking patient samples.

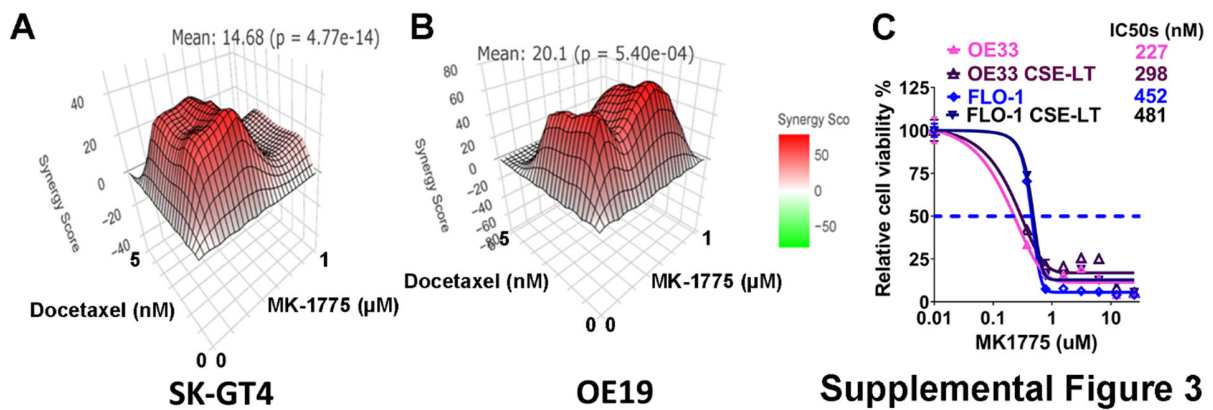

**Figure S3.** A&B. SynergyFinder analysis in SK-GT4 and OE19 cells with MK-1775 and docetaxel treatment. C. IC50 of MK-1775 in FLO-1 and OE33 control or CSE-LT cells.
